# Supplementary material for: Integrative Kinase Activity Profiling and Phosphoproteomics of rd10 Mouse Retina during cGMP-Dependent Retinal Degeneration
Source: MDPI journal article supplement (doi:10.3390/ijms25063446), 2024-03-19
Supplement: s1 [file s1]

## Supplementary Data

Supplementary Table S1: Kinase analysis from MS-based Phosphoproteomic results for *rd10* vs. *rd10* CN03

|    | Kinase Name | Kinase Uniprot ID | Log(fold change) | -log <sub>10</sub> (p-val) |
|----|-------------|-------------------|------------------|----------------------------|
| 1  | MAPK14      | Q16539            | -1.68            | 3.91                       |
| 2  | AKT1        | P31749            | 0.76             | 3.41                       |
| 3  | RPS6KA1     | Q15418            | 0.79             | 3.00                       |
| 4  | AURKB       | Q96GD4            | 0.73             | 2.96                       |
| 5  | ZAP70       | P43403            | -1.43            | 2.91                       |
| 6  | PRKCA       | P17252            | 0.59             | 2.55                       |
| 7  | PNCK        | Q6P2M8            | 0.69             | 2.54                       |
| 8  | CDK2        | P24941            | 1.11             | 2.45                       |
| 9  | FYN         | P06241            | 1.01             | 2.18                       |
| 10 | ATR         | Q13535            | 0.90             | 2.10                       |
| 11 | GSK3B       | P49841            | 0.57             | 2.04                       |
| 12 | CSNK1A1     | P48729            | 0.57             | 2.04                       |
| 13 | PLK3        | Q9H4B4            | 0.57             | 2.04                       |
| 14 | PRKACA      | P17612            | 0.95             | 1.91                       |
| 15 | PRKCG       | P05129            | -0.64            | 1.89                       |
| 16 | RPS6KA3     | P51812            | 0.58             | 1.88                       |
| 17 | MKNK1       | Q9BUB5            | 0.65             | 1.80                       |
| 18 | RPS6KB2     | Q9UBS0            | 0.65             | 1.80                       |
| 19 | ATM         | Q13315            | 0.95             | 1.77                       |
| 20 | GRK6        | P43250            | 0.65             | 1.61                       |
| 21 | RPS6KB1     | P23443            | 1.27             | 1.47                       |
| 22 | CAMK2A      | Q9UQM7            | -1.74            | 1.46                       |
| 23 | MAPKAPK2    | P49137            | -0.96            | 1.41                       |
| 24 | MAPK1       | P28482            | -0.98            | 1.34                       |
| 25 | MAPK3       | P27361            | -0.98            | 1.34                       |
| 26 | ABL1        | P00519            | -0.98            | 1.34                       |
| 27 | TRPM7       | Q96QT4            | 0.64             | 1.33                       |
| 28 | CSNK2B      | P67870            | 0.64             | 1.33                       |

Supplementary Table S2: List of antibodies used in Western blotting

| Target protein                                           | Antibody                                 | Molecular weight | Supplier                   | Catalogue no. | Dilution |
|----------------------------------------------------------|------------------------------------------|------------------|----------------------------|---------------|----------|
| HSP90                                                    | HSP 90a/b (F08)                          | 90 kD            | Santa cruz biotechnologies | sc-13119      | 1:500    |
| pCREB                                                    | Phospho-CREB (Ser133; F.959.4)           | 43 kDa           | ThermoFisher Scientific    | MA5-11192     | 1:1000   |
| pCaMK2                                                   | Phospho-CaMKII beta/gamma/delta (Thr287) | 54/60 kDa        | ThermoFisher Scientific    | PA5-37833     | 1:1000   |
| pCaMK4                                                   | Anti-phospho-CaMK4 (pThr196/200)         | 51 kDa           | Sigma Aldrich              | SAB4504122    | 1:500    |
| secondary antibody:<br>HSP90                             | Anti-mouse-HRP                           | -                | Santa cruz biotechnologies | SC-2005       | 1:50000  |
| secondary antibody:<br>pCREB,<br>pCaMK2<br>and<br>pCaMK4 | Anti-Rabbit-HRP                          | -                | Cell Signaling Technology  | 7074S         | 1:50000  |
